# Supplementary material for: Investigating aberrantly expressed microRNAs in peripheral blood mononuclear cells from patients with treatment-resistant schizophrenia using miRNA sequencing and integrated bioinformatics
Source: PubMed Central journal article supplement — Mol Med Rep. 2020 Sep 15;22(5):4340–50. doi: 10.3892/mmr.2020.11513 (PMC7533444; doi:10.3892/mmr.2020.11513), 2020-09-15
Supplement: Supplementary_Data.pdf [file Supplementary_Data.pdf]

Table SI. PCR primers for the 3 miRNAs selected.

| miRNA           | Primer sequence (5'-3') |
|-----------------|-------------------------|
| hsa-miR-1262    | GCAGATGGGTGAATTTGTAGA   |
| hsa-miR-1304-3p | GCAGTCTCACTGTAGCCT      |
| hsa-miR-218-5p  | CGCAGTTGTGCTTGATCT      |

miRNA/miR, microRNA; hsa, *Homo sapiens*.

Table SII. Main instruments and equipment.

| Name                                | Manufacturing company            | Model      |
|-------------------------------------|----------------------------------|------------|
| Pipette                             | Gilson                           | Pipetman P |
| Electrophoresis                     | Beijing Liuyi Instrument Factory | DYY-6C     |
| Quantitative PCR Reaction Amplifier | ABI                              | 7900HT     |
| UV spectrophotometer                | Shanghai Analysis                | UV-2202    |
| Centrifuge                          | Eppendorf                        | 5424 R     |

Table SIII. Main experimental reagents.

| Name                                     | Manufacturing company                      |
|------------------------------------------|--------------------------------------------|
| Invitrogen™ TRIzol™ Reagent              | Invitrogen; Thermo Fisher Scientific, Inc. |
| Human Lymphocyte Separation Medium       | Dakwei Biological Engineering              |
| miRcute miRNA Isolation Kit              | TIANGEN                                    |
| miRcute Plus miRNA First-Strand cDNA Kit | TIANGEN                                    |
| miRcute Plus miRNA qPCR Kit (SYBR Green) | TIANGEN                                    |
